# Supplementary material for: Stretchable and Self-Healable Graphene–Polymer Conductive Composite for Wearable EMG Sensor
Source: MDPI journal article supplement (doi:10.3390/polym14183766), 2022-09-08
Supplement: s1 [file s1]

## Supplementary Materials

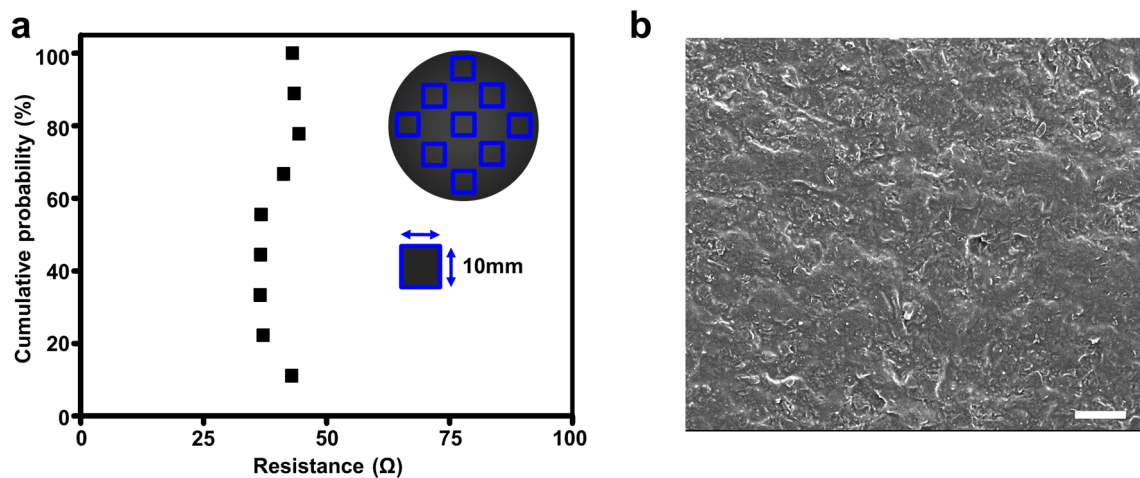

**Figure S1.** Uniformity of the optimized SHP-graphene composite conductor. (a) Resistance measurement of 9 different points on the conductor film for area uniformity evaluation. (b) SEM image of the SHP-graphene composite surface (Scale bar: 100  $\mu\text{m}$ ).

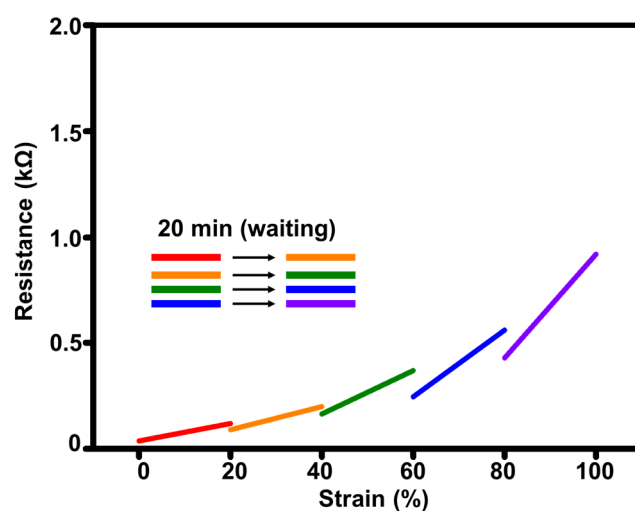

**Figure S2.** Resistance-strain data of the held composite for 20 min at 20% intervals. After stretching at 20% intervals, the resistance of the composite gradually decreased during holding for 20 min.

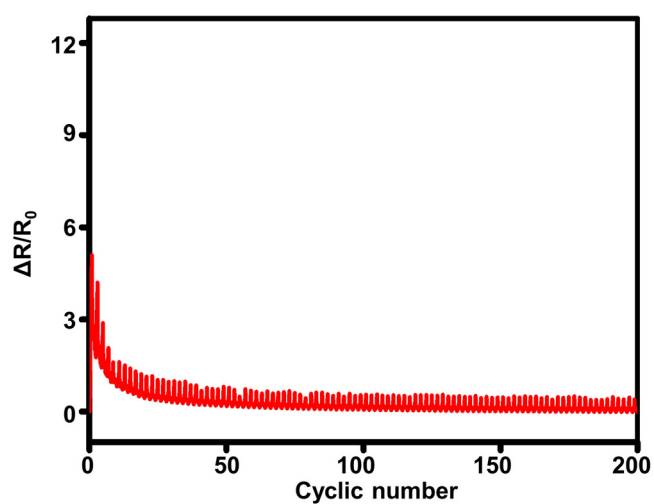

**Figure S3.** Cyclic durability of the optimized composite. To verify that the electrical and mechanical durability is stable even under repeated 0% to 100% strain.

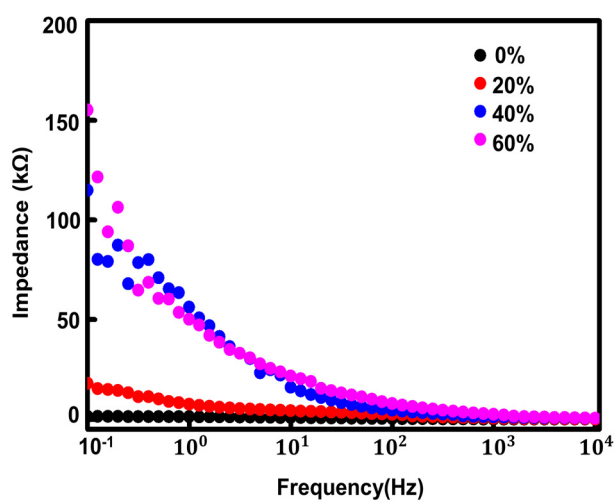

**Figure S4.** Impedance–frequency data of the composite according to the strain. Impedance measured according to the frequency of the optimized composite at strain of 0% (black), 20% (red), 40% (blue), 60% (pink).

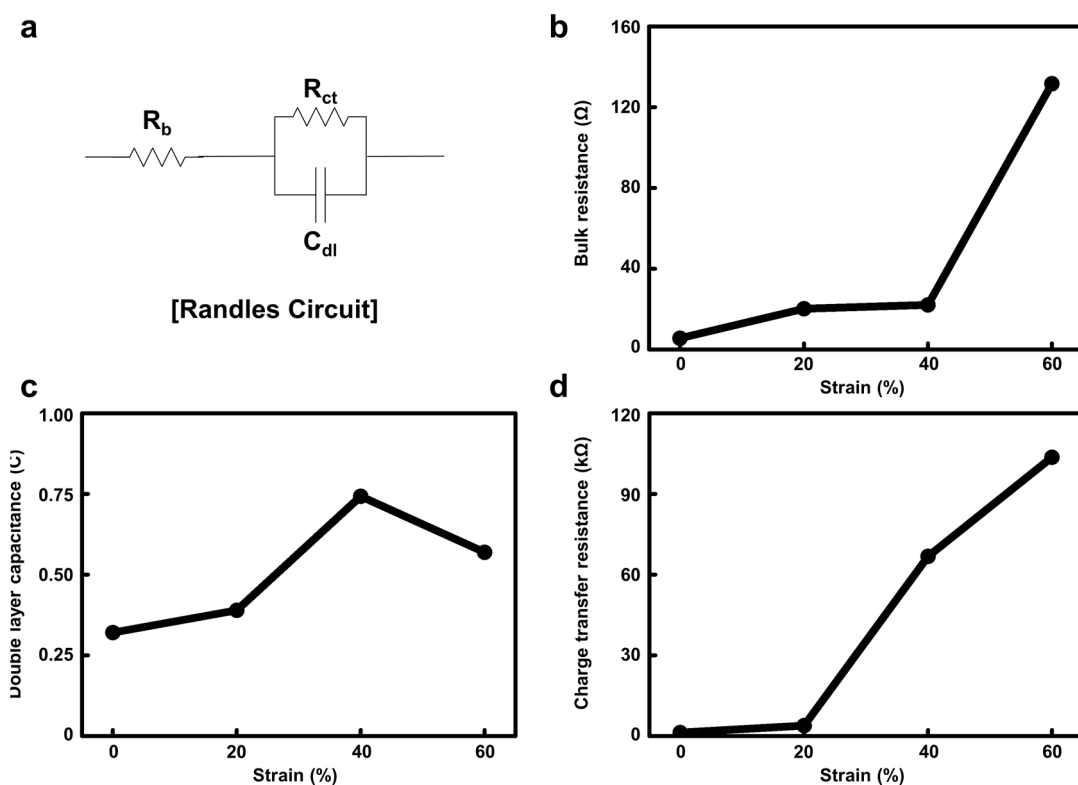

**Figure S5.** Characterization of the electrode according to the strain. (a) The equivalent circuit model consisting of bulk resistance ( $R_b$ ), electric double layer capacitance ( $C_{dl}$ ) and charge transfer resistance ( $R_{ct}$ ). (b) Bulk resistance value according to the strain. (c) Double layer capacitance value according to the strain. (d) Charge transfer resistance value according to the strain.

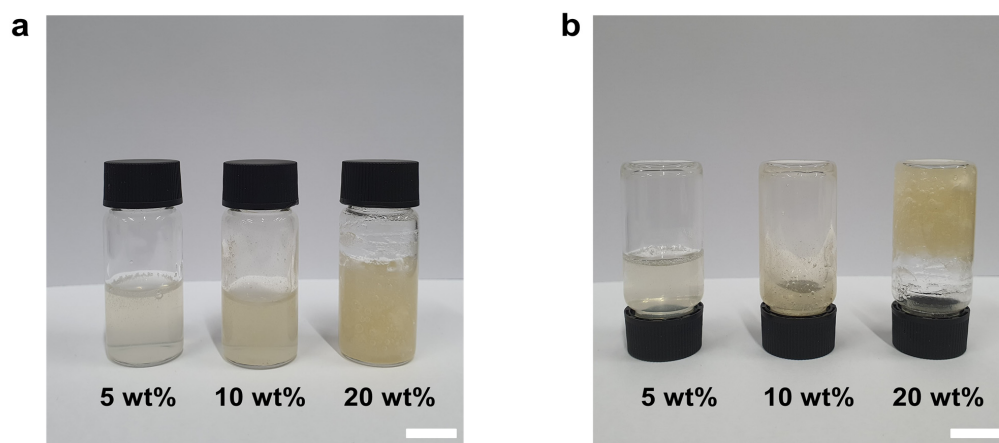

**Figure S6.** Photographs of the alginate solution according to concentration. (a) 5 wt% (left), 10 wt% (middle) and 20 wt% (right) of the alginate solution, respectively. (b) Right after turning over vials (Scale bar: 1 cm).

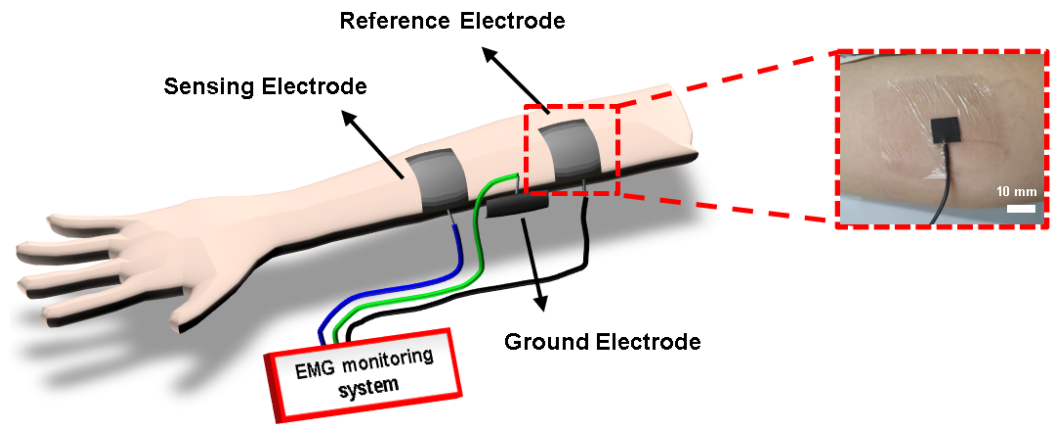

**Figure S7.** Schematic of electrode positioning for EMG monitoring. Illustration of positioning the three-electrode (sensing, reference, and ground) and a photograph of the composite electrode. (Scale bar: 10 mm).
